# Supplementary material
Source: PubMed Central journal article supplement (PMC3145138)
Supplement: NIHMS34805-supplement-Supplementary_Figures_S1-S3_and_Table_S1.pdf [file NIHMS34805-supplement-Supplementary_Figures_S1-S3_and_Table_S1.pdf]

**Supplemental Fig 1: Exogenous d<sub>5</sub>-DHA is incorporated into MP phospholipids.**

Human PMN ( $25 \times 10^6$ ) were incubated with d<sub>5</sub>-DHA (5 μg) for 30min, 37°C and MPs were collected to assess whether exogenous DHA could be detected within MP phospholipids. Tandem mass spectra of biogenic (A) hexadecanoyl-docosahexaenoyl phosphatidylcholine and (B) hexadecanoyl-hydroxydocosahexaenoyl phosphatidylcholine. Acyl group positions are arbitrarily assigned. Compounds were identified as acetate adducts in negative ionization mode using Qstar-XL.

**Supplemental Fig 2: Microparticles enhance efferocytosis.** Human monocyte-derived macrophages (7-day differentiated with 10ng/ml GM-CSF) were seeded at  $1 \times 10^5$ /well, and vehicle or MPs ( $8 \times 10^5$ ) were added 15min prior to addition of PKH26 (Sigma)-labeled human apoptotic PMN ( $3 \times 10^5$ ). After 1h macrophages were washed and efferocytosis was assessed using a PerkerElmer VICTOR<sup>3</sup> plate reader.

**Supplemental Fig 3: Nano-pro-resolving medicines reduce peritoneal PMN infiltration.** Human NPRMs ( $1 \times 10^4$  -  $3 \times 10^5$ ) were given (A) i.v. or (B) i.p. as indicated prior to zymosan A (0.1mg, i.p) and peritoneal PMN infiltration was assessed at 2h.

**Supplemental Table I: Microparticle fatty acid liberation with sPLA<sub>2</sub>.**

Microparticles were collected from zymoan peritonitis (1mg, i.p.) exudates at 48h and incubated with or without human recombinant secretory PLA<sub>2</sub> type V (0.7U, Cayman Chemical) for 30min at 37°C, and liberation of fatty acids was assessed using LC-MS/MS.

Figure S1

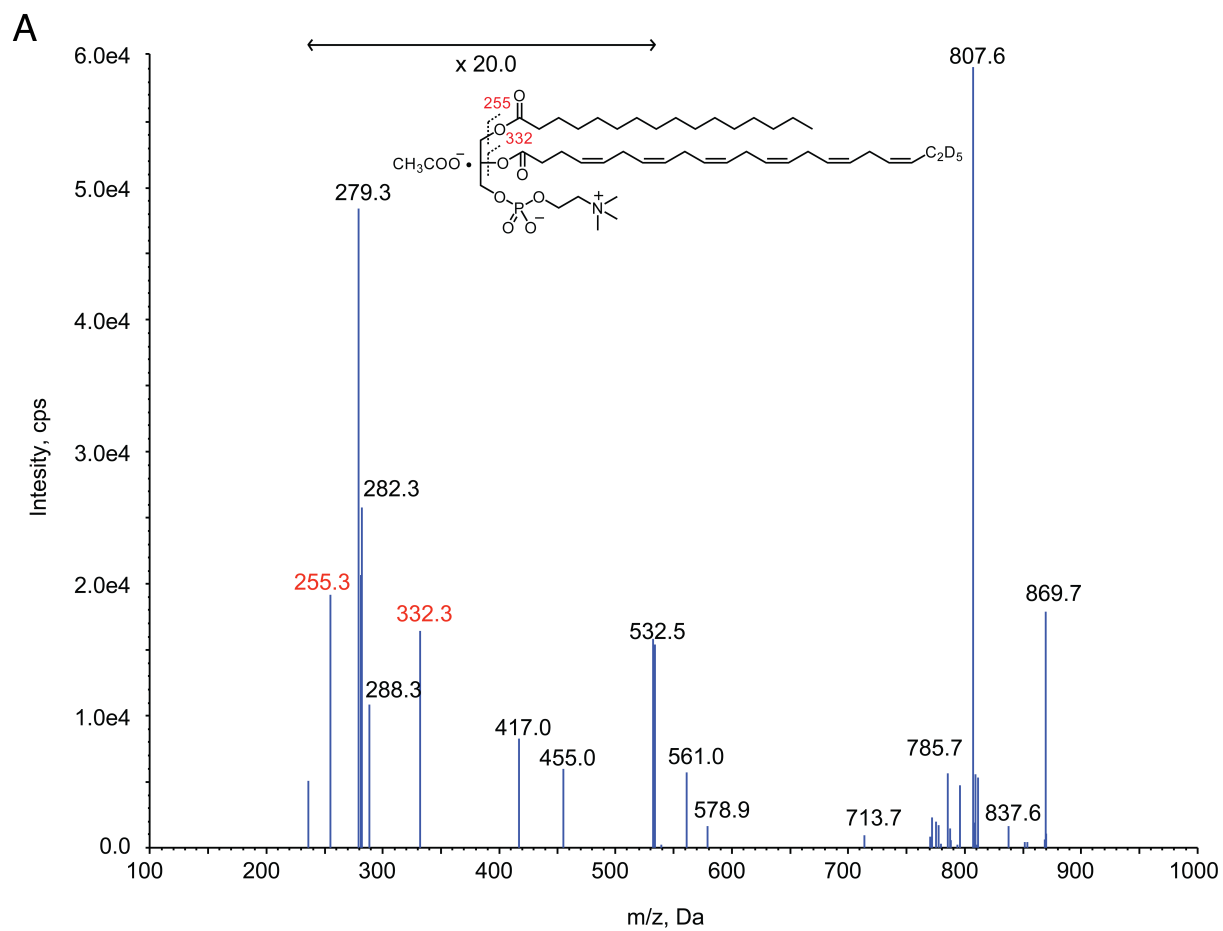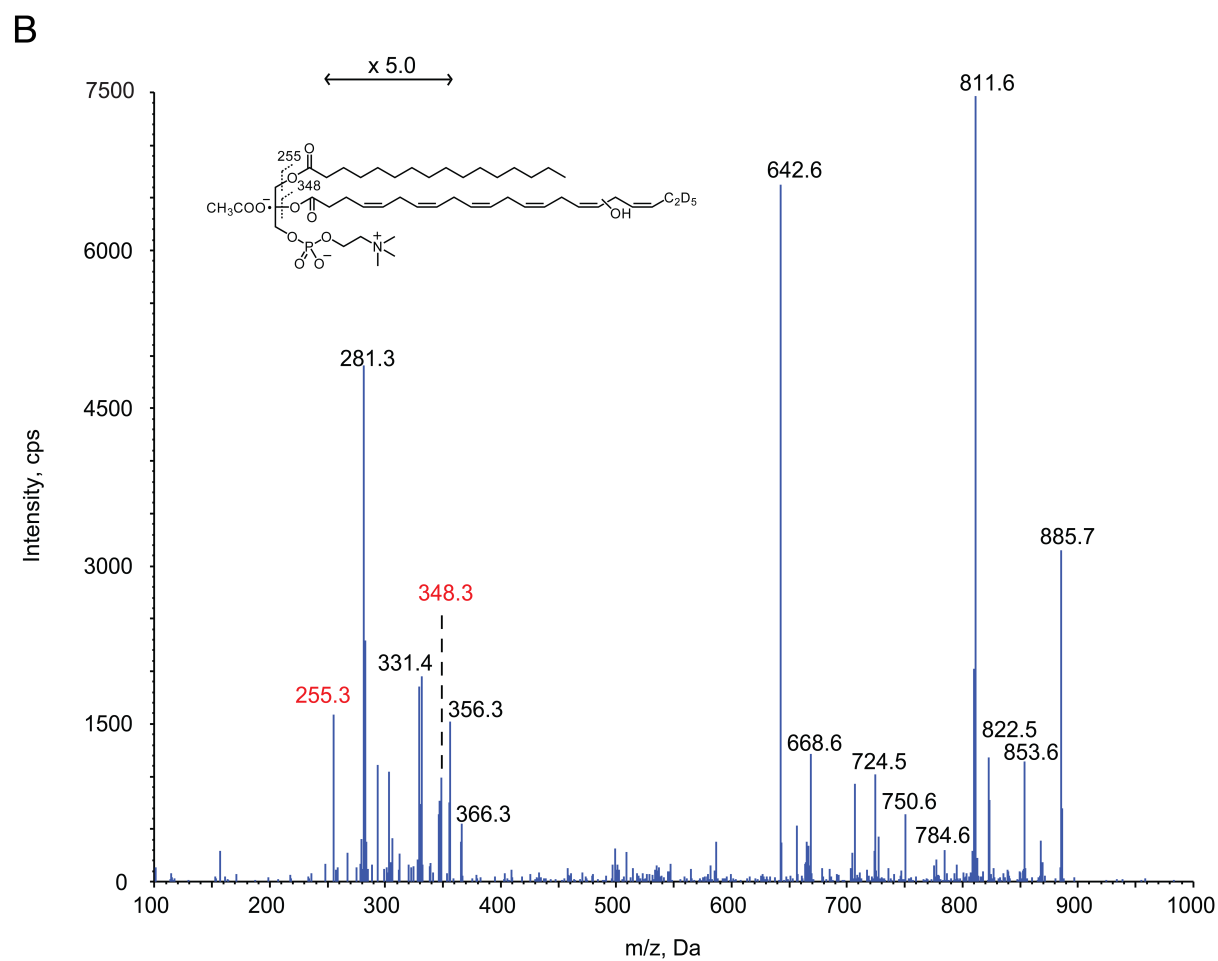

Figure S2

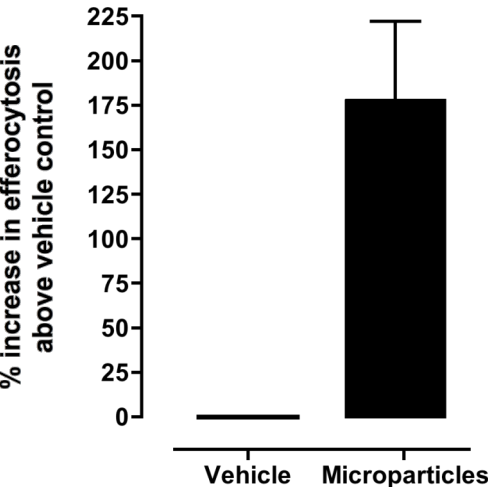

# Figure S3

## A

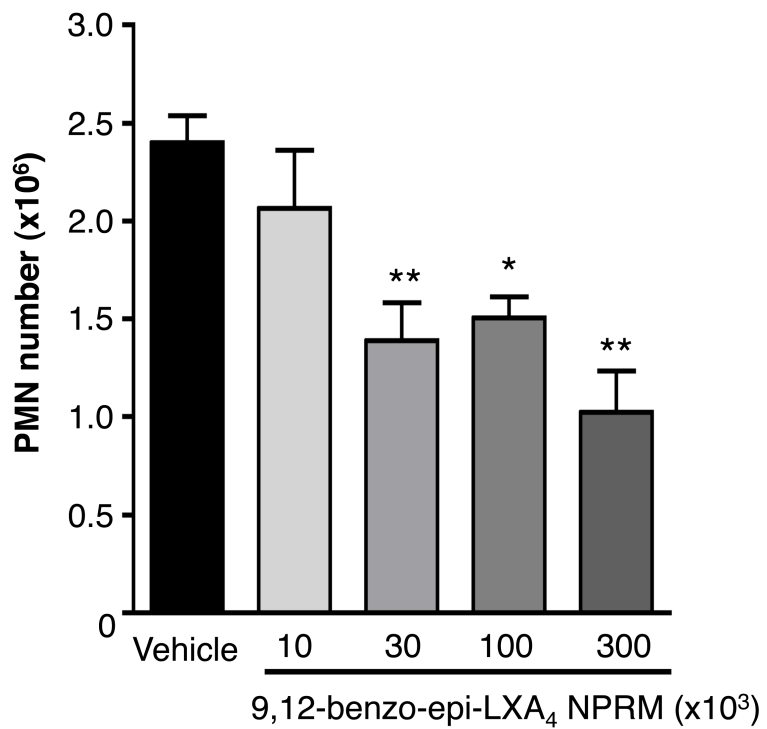

## B

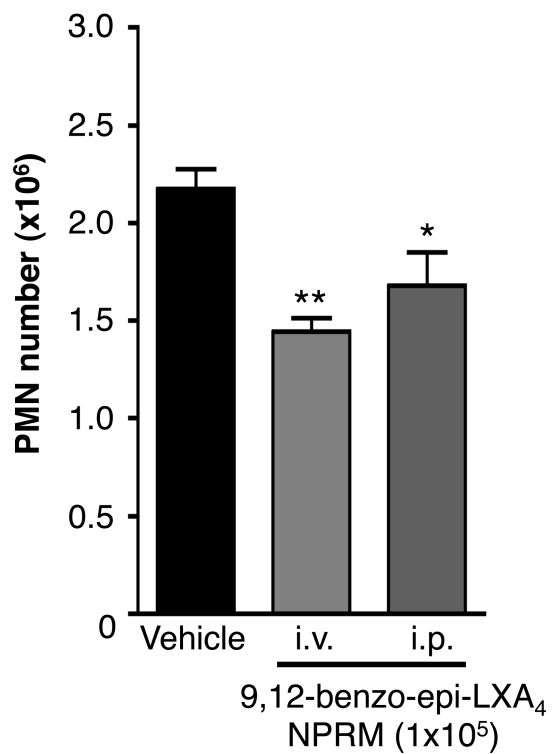

|               | DHA<br>(pg) | EPA<br>(pg) | AA<br>(pg) | 17-HDHA<br>(pg)* | 14-HDHA<br>(pg)* | 5-HETE<br>(pg)* | 12-HETE<br>(pg)* | 15-HETE<br>(pg)* |
|---------------|-------------|-------------|------------|------------------|------------------|-----------------|------------------|------------------|
| MP            | 568         | 205         | 855        | 0.56             | 2.22             | 1.62            | 3.58             | 2.22             |
| MP +<br>sPLA2 | 5750        | 1620        | 10400      | 5.8              | 9.55             | 15.3            | 34.6             | 9.18             |

**Supplemental Table I: Microparticle fatty acid liberation with sPLA<sub>2</sub>.**

\*Monohydroxy fatty acids were identified by retention time and multiple reaction monitoring. Transition pairs: 17-HDHA 343, 245; 14-HDHA 343, 205; 5-HETE 319, 115; 12-HETE 319,179 and 15-HETE 319, 219.
